# Supplementary material
Source: publisher figshare collection journal article supplement (https://frontiersin.figshare.com/ndownloader/files/14081237)
Supplement: Supplementary file [file 14081237]

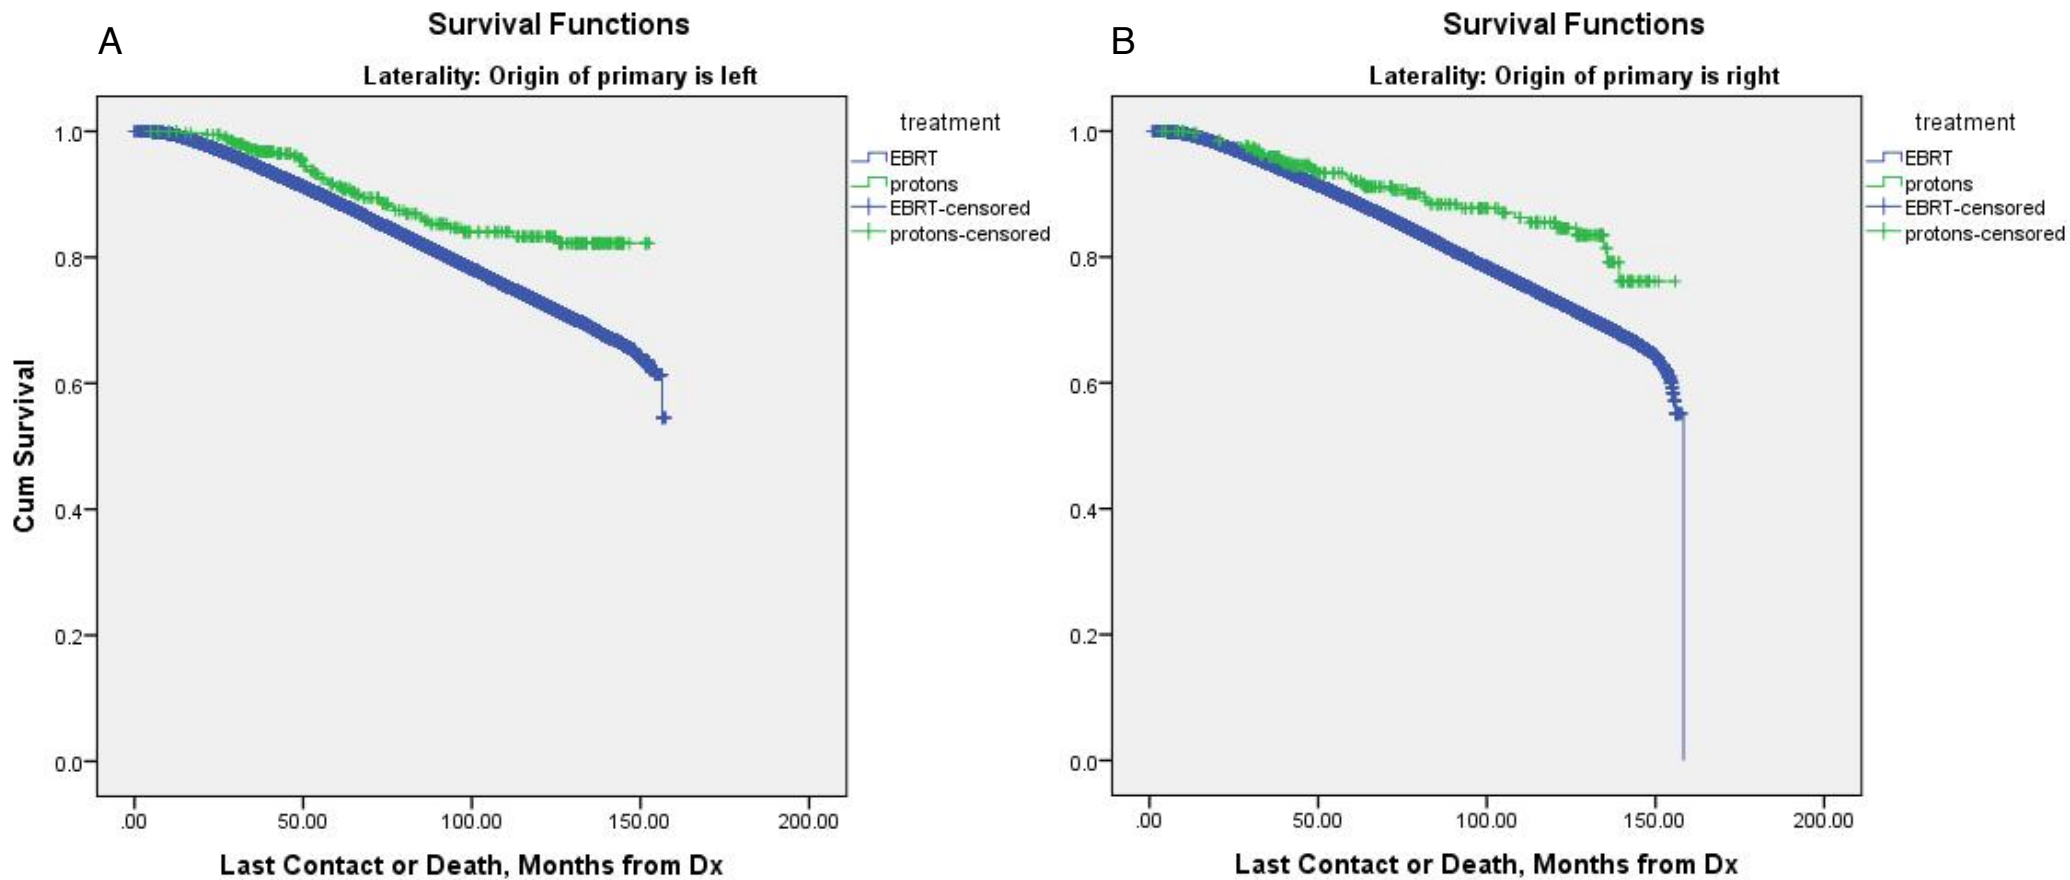

**Supplemental Figure 1:** Overall Survival for Left (A) vs. Right (B) Sided Tumors with Proton vs. Non-Proton EBRT

#### Left-sided Cohort

##### 5-year Overall Survival

- Non-Proton (EBRT): 88.7%
- Protons: 91.7%

p-value=0.001

#### Right Sided Cohort

##### 5-year Overall Survival

- Non-Proton (EBRT): 89.0%
- Protons: 92.5%

p-value=0.001
